# Supplementary material for: NiMoO4nanowire @ MnO2nanoflake core/shell hybrid structure aligned on carbon cloth for high-performance supercapacitors
Source: Royal Society of Chemistry journal article supplement (doi:10.1039/c4ra14442b), 2015-01-01
Supplement: c4ra14442b1.pdf [file c4ra14442b1.pdf]

Electronic Supplementary Material

## NiMoO<sub>4</sub> nanowire @ MnO<sub>2</sub> nanoflake core/shell hybrid structure aligned on carbon cloth for high-performance supercapacitors

Di Guo<sup>a</sup>, Weiji Ren<sup>a</sup>, Zhi Chen<sup>a</sup>, Minglei Mao<sup>a</sup>, Qihong Li<sup>\*b</sup>, Taihong Wang<sup>\*\*a</sup>

<sup>a</sup>College of Chemistry and Chemical Engineering, State Key Laboratory of Chem/Bio-Sensing and Chemometrics, Hunan University, Changsha, Hunan 410082, P. R. China

<sup>b</sup>Pen-Tung Sah Institute of Micro-Nano Science and Technology of Xiamen University, Xiamen, 361005, China.

\*E-mail: liqihong2004@hotmail.com (Q. H. Li); thwang@iphy.ac.cn (T. H. Wang);  
Tel.: +86 0731 88664019; Fax: +86 0731 88822137.

### Supplementary Figures

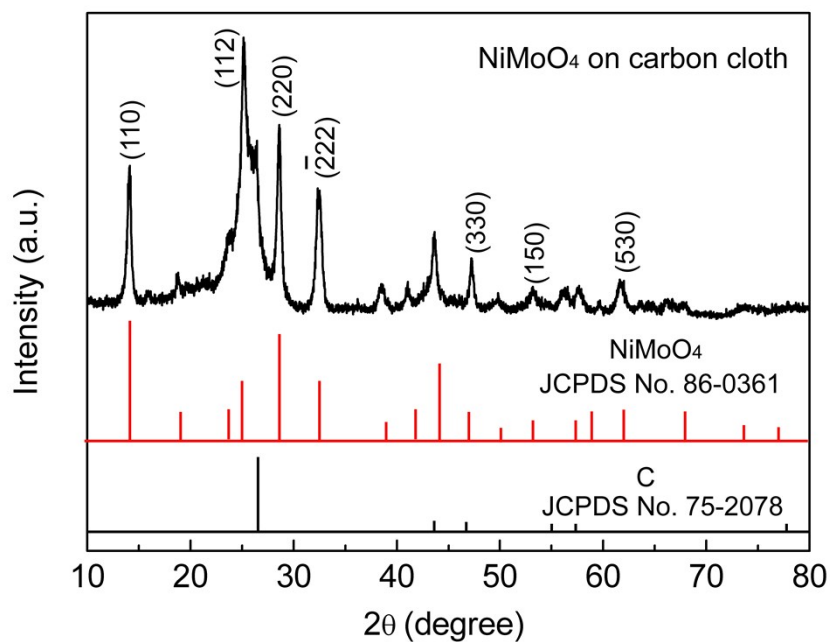

Figure S1 The XRD patterns of NiMoO<sub>4</sub> NWs on carbon cloth.

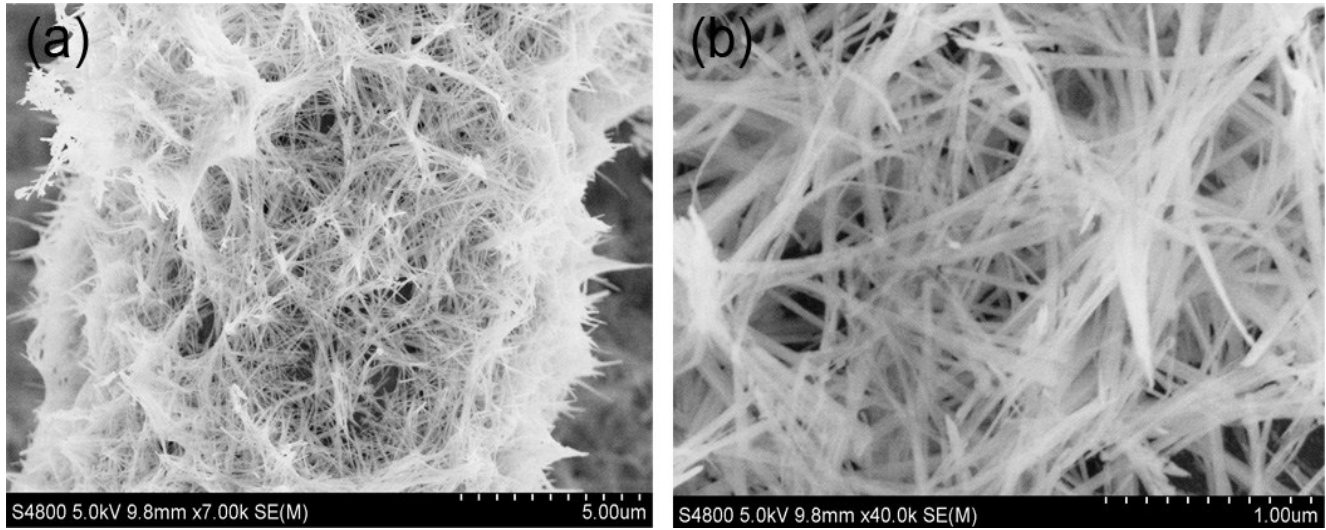

Figure S2 (a) and (b) The SEM images of NiMoO<sub>4</sub> NWs on carbon cloth.

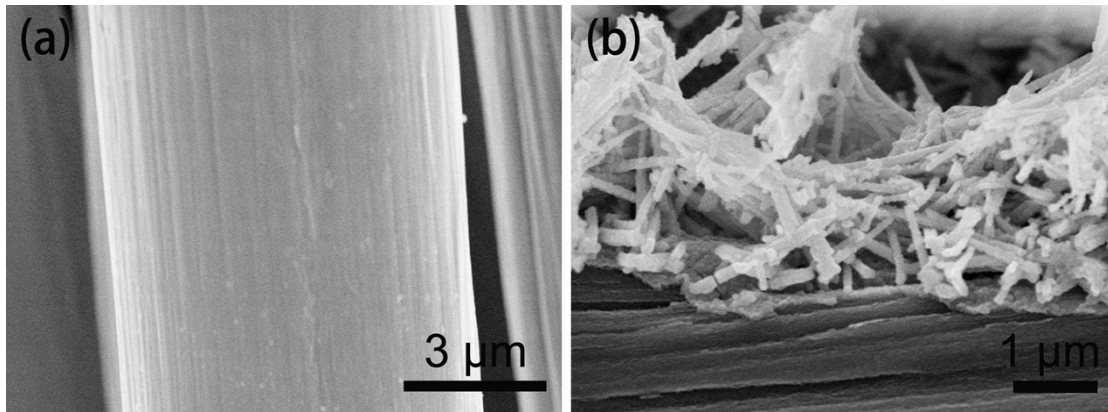

Figure S3 The SEM image of a carbon fiber from the pristine carbon cloth (a) and the cross-sectional SEM image of NiMoO<sub>4</sub>@MnO<sub>2</sub> on a carbon fiber (b).

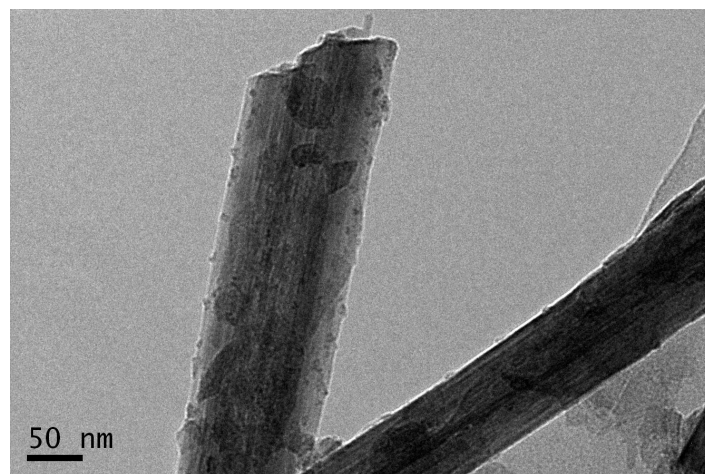

Figure S4 The TEM image of NiMoO<sub>4</sub> NWs on carbon cloth.

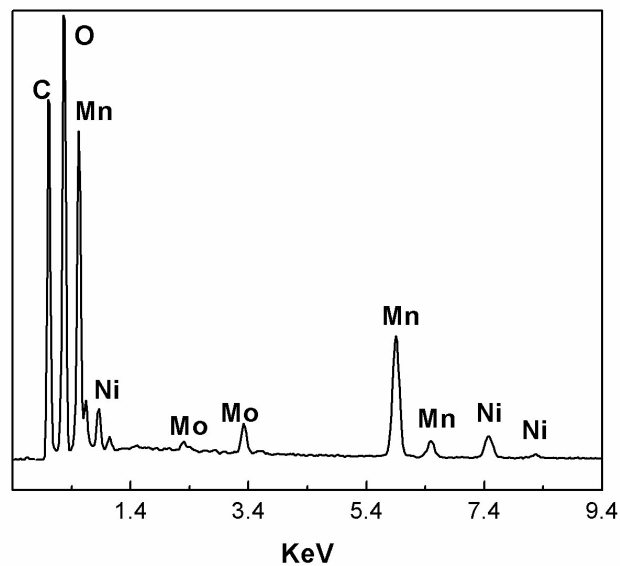

Figure S5 The EDS patterns of NiMoO<sub>4</sub> @ MnO<sub>2</sub> hybrid on carbon cloth.

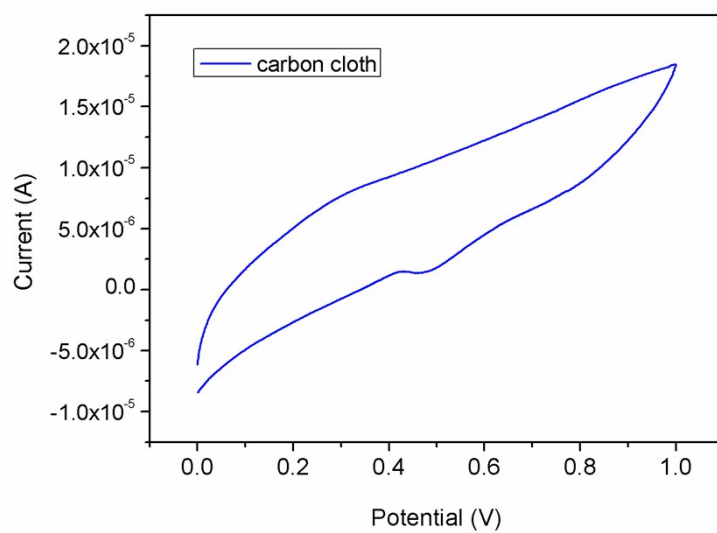

Figure S6 CV curve of the pristine carbon cloth at scan rate of 50 mV s<sup>-1</sup>.

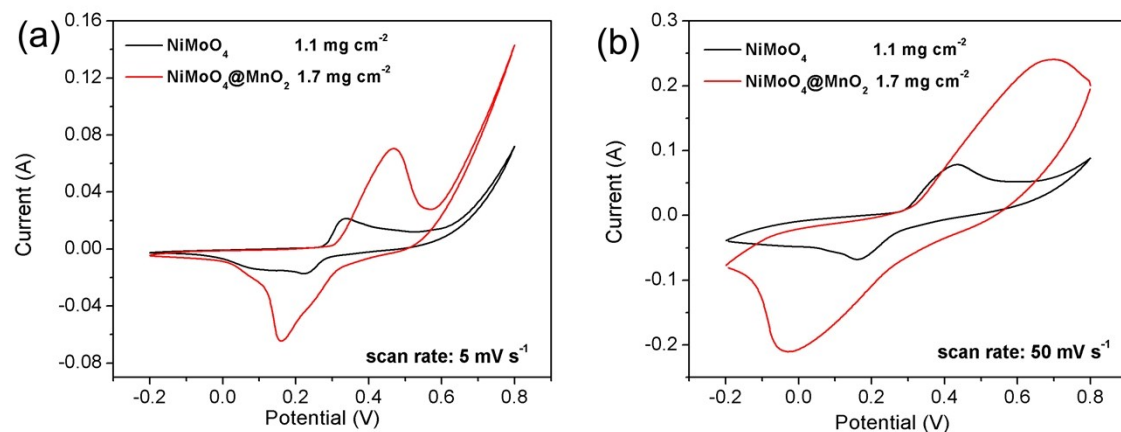

Figure S7 CV curves of NiMoO<sub>4</sub> NWs and NiMoO<sub>4</sub> @ MnO<sub>2</sub> hybrid electrode at scan rate of 5 mV s<sup>-1</sup> (a) and 50 mV s<sup>-1</sup> (b).

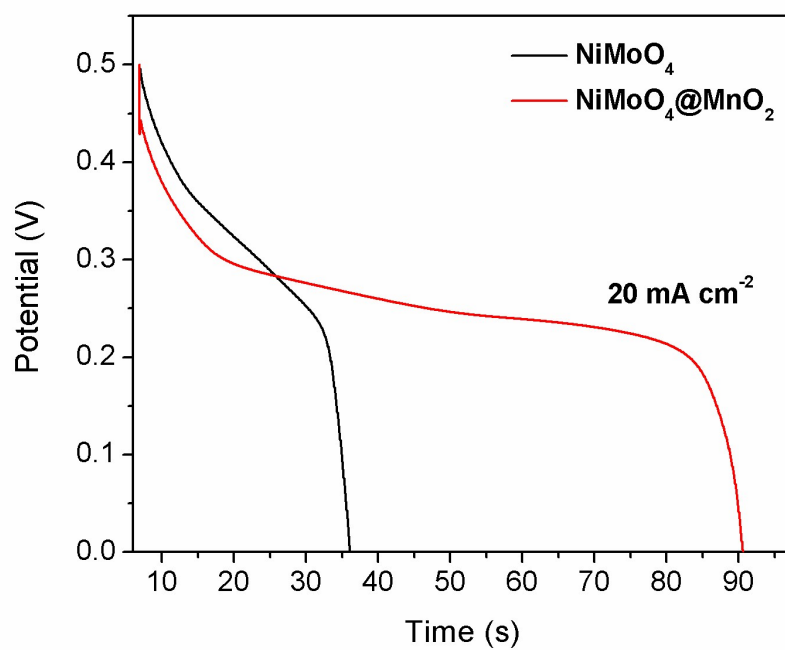

Figure S8 Galvanostatic discharge curves of NiMoO<sub>4</sub> NWs and NiMoO<sub>4</sub> @ MnO<sub>2</sub> hybrid electrode at current density of 20 mA cm<sup>-2</sup>.

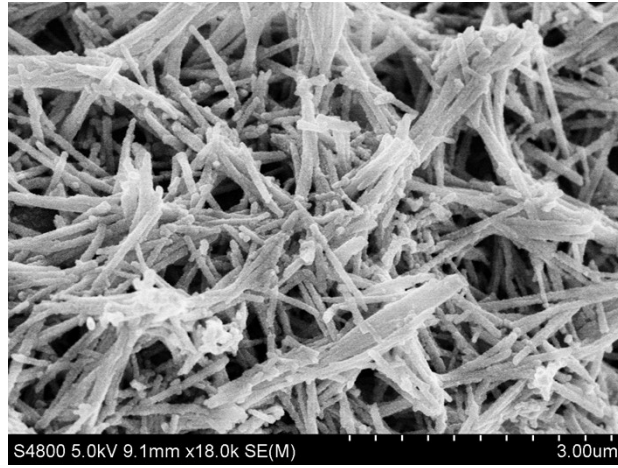

Figure S9 SEM image of the NiMoO<sub>4</sub> @ MnO<sub>2</sub> hybrid electrode after 4000 cycles.
